# Supplementary material for: Anticancer Effects of New Ceramides Isolated from the Red Sea Red Algae Hypnea musciformis in a Model of Ehrlich Ascites Carcinoma: LC-HRMS Analysis Profile and Molecular Modeling
Source: MDPI journal article supplement (doi:10.3390/md20010063), 2022-01-10
Supplement: s1 [file s1]

**Anticancer Effects of New Ceramides Isolated from the Red Sea Red Algae *Hypnea musciformis* In a Model of Ehrlich Ascites Carcinoma: LC-HRMS Analysis Profile and Molecular Modeling**

**Additional Experimental Detail**

| No.        |                                                                                         | Page |
|------------|-----------------------------------------------------------------------------------------|------|
| Figure S1  | LC-ESI-HRMS chromatogram of crude extract of <i>Hypnea musciformis</i> (positive mode). | 2    |
| Figure S2  | LC-ESI-HRMS chromatogram of crude extract of <i>Hypnea musciformis</i> (negative mode). | 3    |
| Figure S3  | ESI-HRMS chromatogram of ceramide <b>A (1)</b> .                                        | 4    |
| Figure S4  | <sup>1</sup> H NMR spectra of ceramide <b>A (1)</b> .                                   | 5    |
| Figure S5  | <sup>13</sup> C NMR spectra of ceramide <b>A (1)</b> .                                  | 6    |
| Figure S6  | ESI-HRMS chromatogram of fatty acid methyl ester of ceramide <b>A (1)</b> .             | 7    |
| Figure S7  | ESI-HRMS chromatogram of ceramide <b>B (2)</b> .                                        | 8    |
| Figure S8  | <sup>1</sup> H NMR spectra of ceramide <b>B (2)</b> .                                   | 9    |
| Figure S9  | <sup>13</sup> C NMR spectra of ceramide <b>B (2)</b> .                                  | 10   |
| Figure S10 | ESI-HRMS chromatogram of fatty acid methyl ester of ceramide <b>B (2)</b> .             | 11   |
| Figure S11 | GC-MS analysis of fatty acid methyl ester of ceramide <b>B (2)</b> .                    | 12   |
| Figure S12 | ESI-HRMS chromatogram of ceramide <b>C (3)</b> .                                        | 13   |
| Figure S13 | <sup>1</sup> H NMR spectra of ceramide <b>C (3)</b> .                                   | 14   |
| Figure S14 | <sup>13</sup> C NMR spectra of ceramide <b>C (3)</b> .                                  | 15   |
| Figure S15 | ESI-HRMS chromatogram of fatty acid methyl ester of ceramide <b>C (3)</b> .             | 16   |
| Figure S16 | ESI-HRMS chromatogram of compound <b>4</b> .                                            | 17   |
| Figure S17 | <sup>1</sup> H NMR spectra of compound <b>4</b> .                                       | 18   |
| Figure S18 | <sup>13</sup> C NMR spectra of compound <b>4</b> .                                      | 19   |
| Figure S19 | ESI-HRMS chromatogram of compound <b>5</b> .                                            | 20   |
| Figure S20 | <sup>1</sup> H NMR spectra of compound <b>5</b> .                                       | 21   |
| Figure S21 | <sup>13</sup> C NMR spectra of compound <b>5</b> .                                      | 22   |
| Figure S22 | ESI-HRMS chromatogram of compound <b>6</b> .                                            | 23   |
| Figure S23 | <sup>1</sup> H NMR spectra of compound <b>6</b> .                                       | 24   |
| Table S1   | Liver enzymes and kidney markers in the study groups.                                   | 25   |

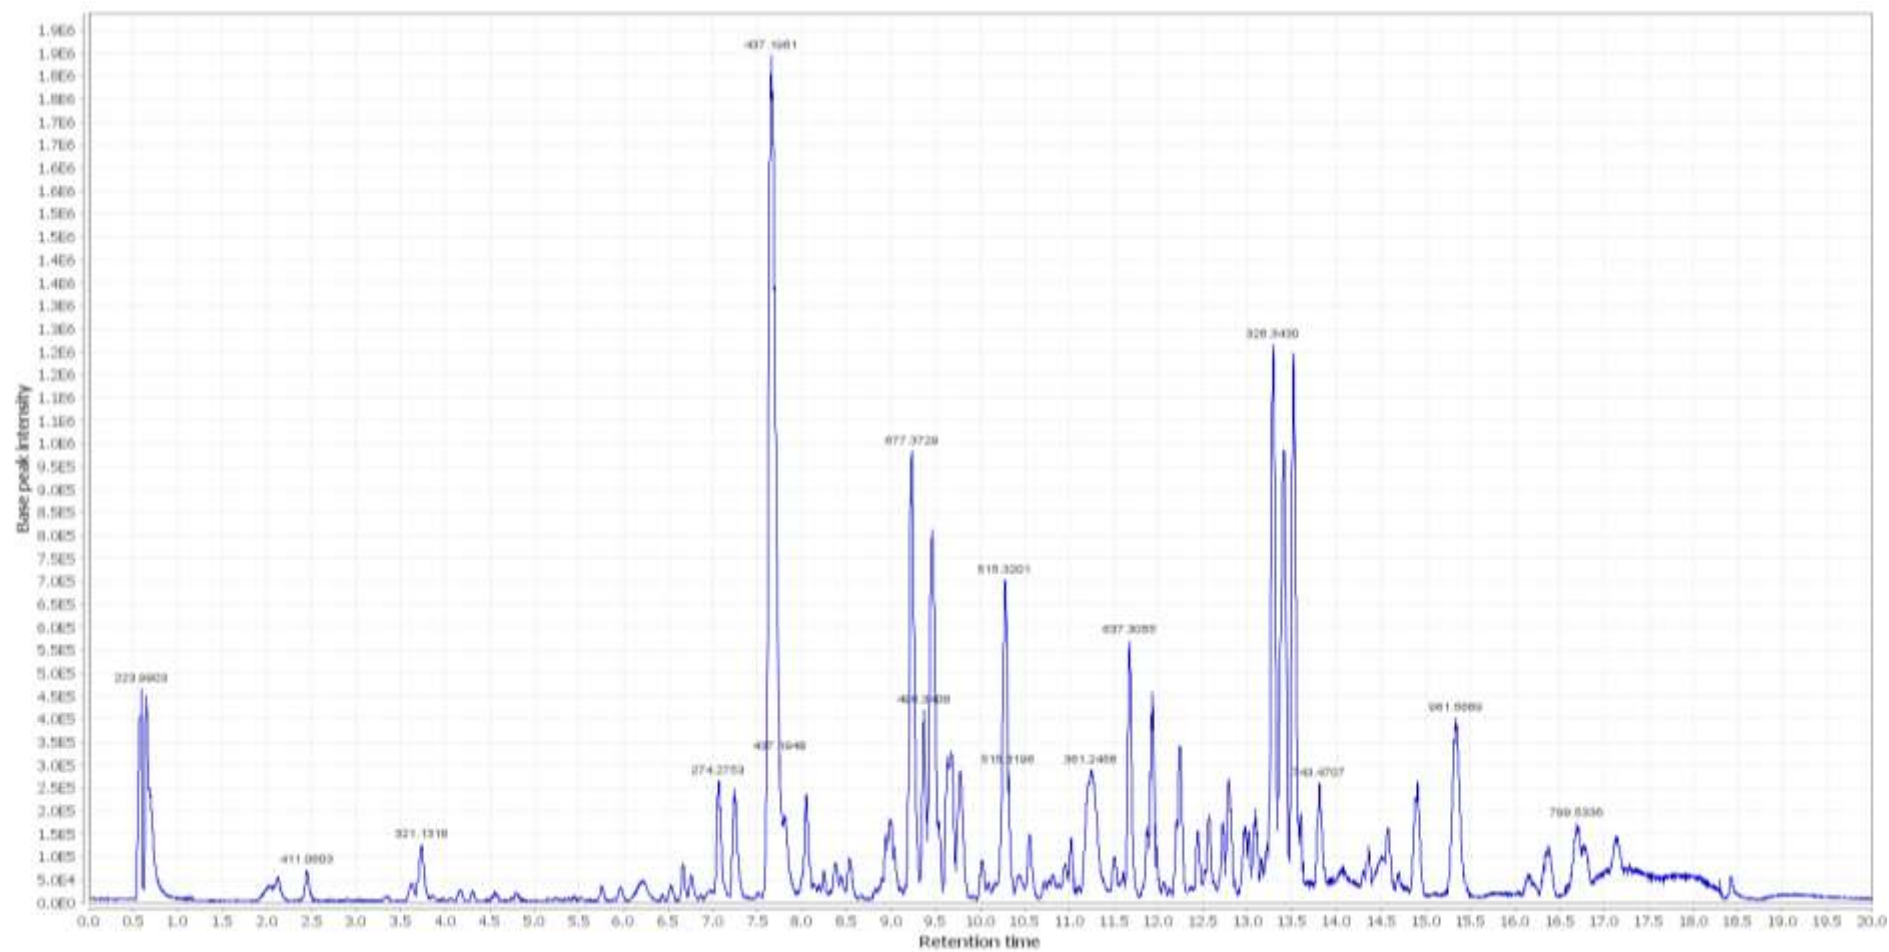

Figure S1. LC-ESI-HRMS chromatogram of crude extract of *Hypnea musciformis* (positive mode).

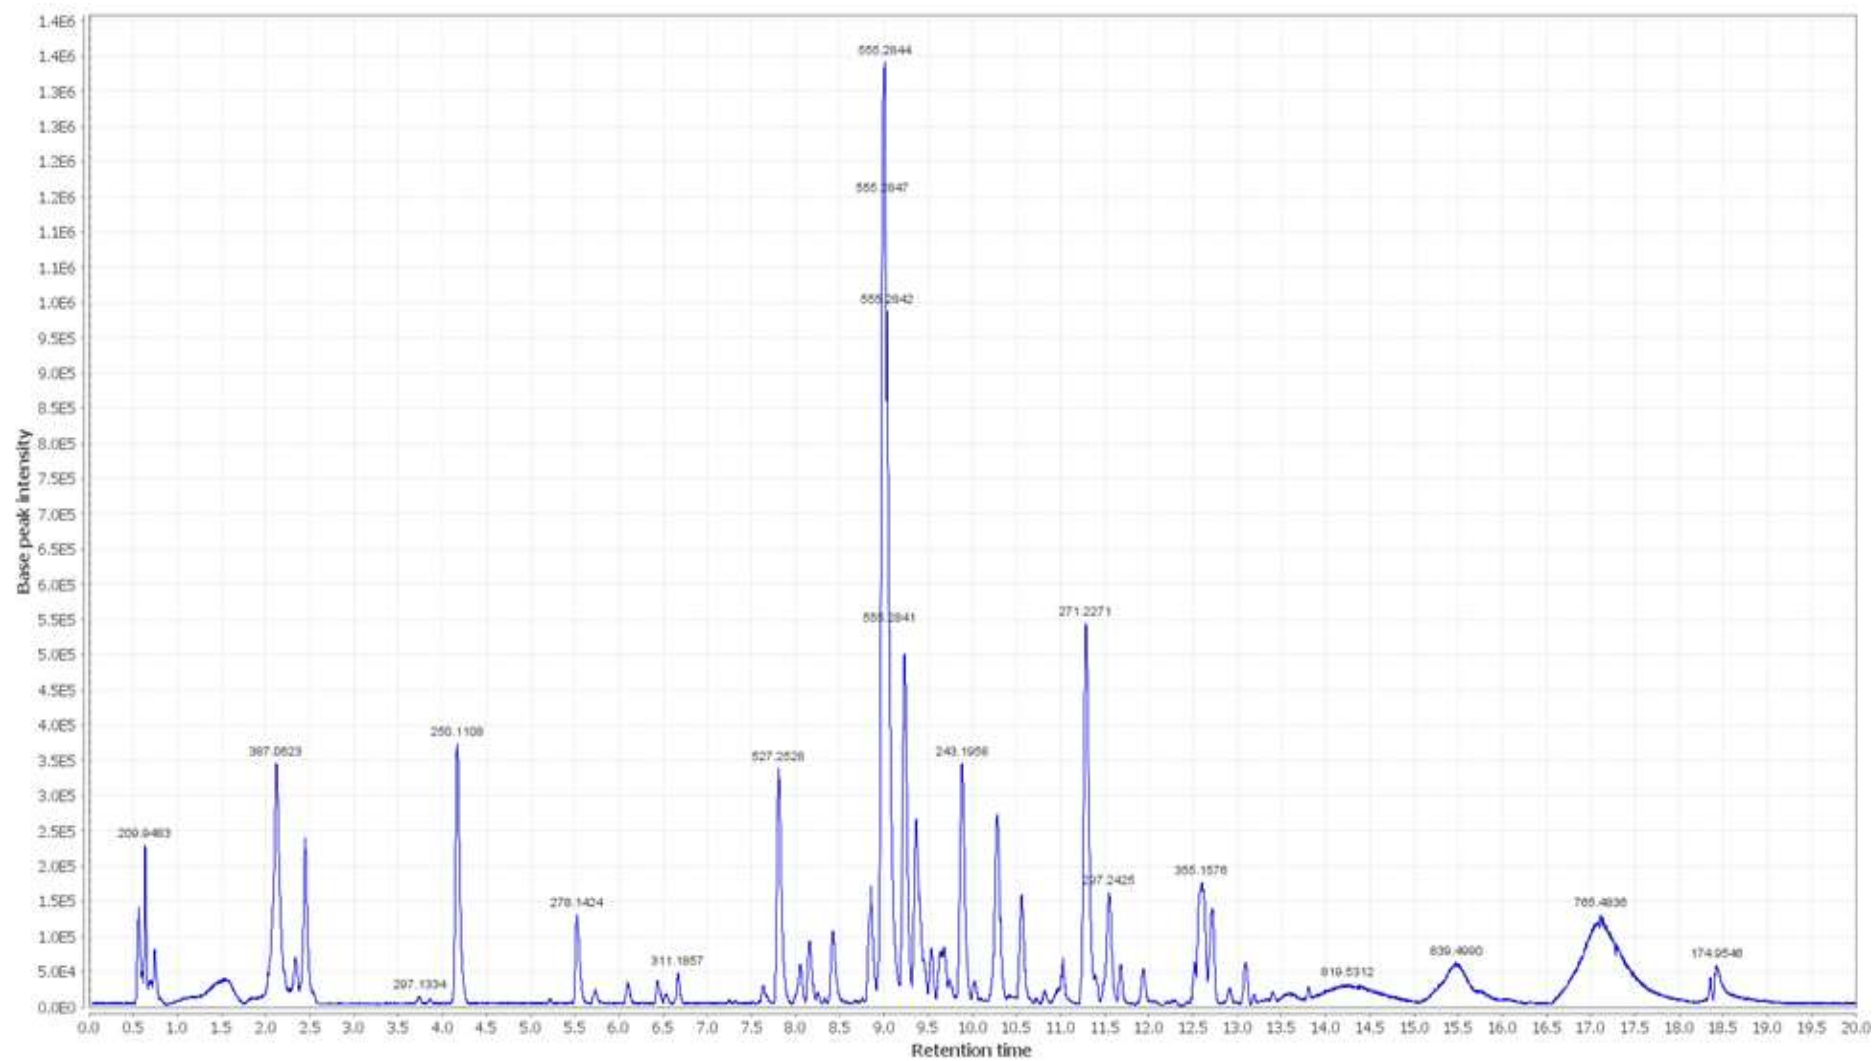

Figure S2. LC-ESI-HRMS chromatogram of crude extract of *Hypnea musciformis* (negative mode).

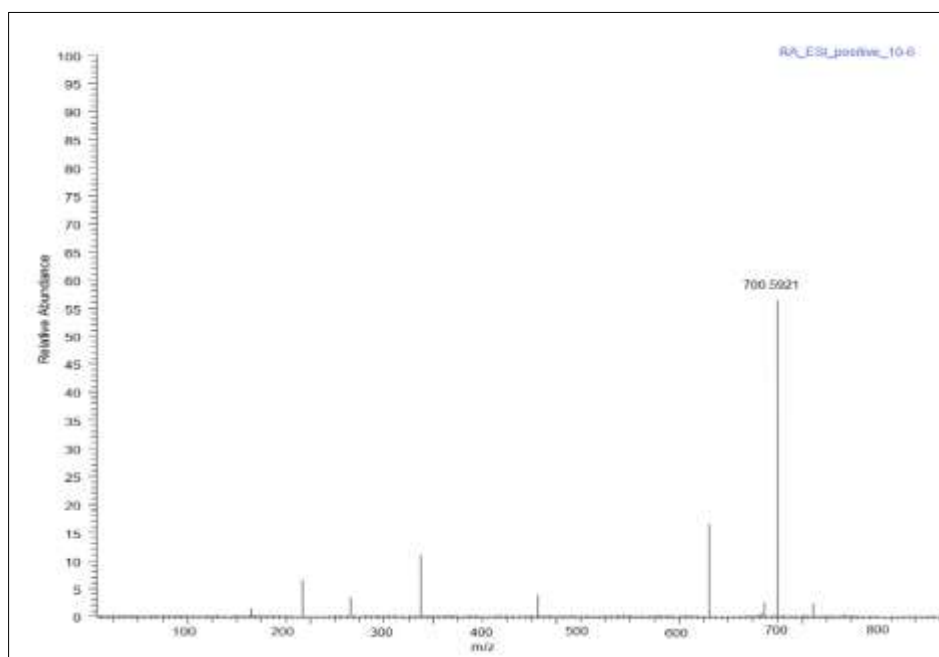

Figure S3. ESI-HRMS chromatogram of ceramide **A** (**1**)

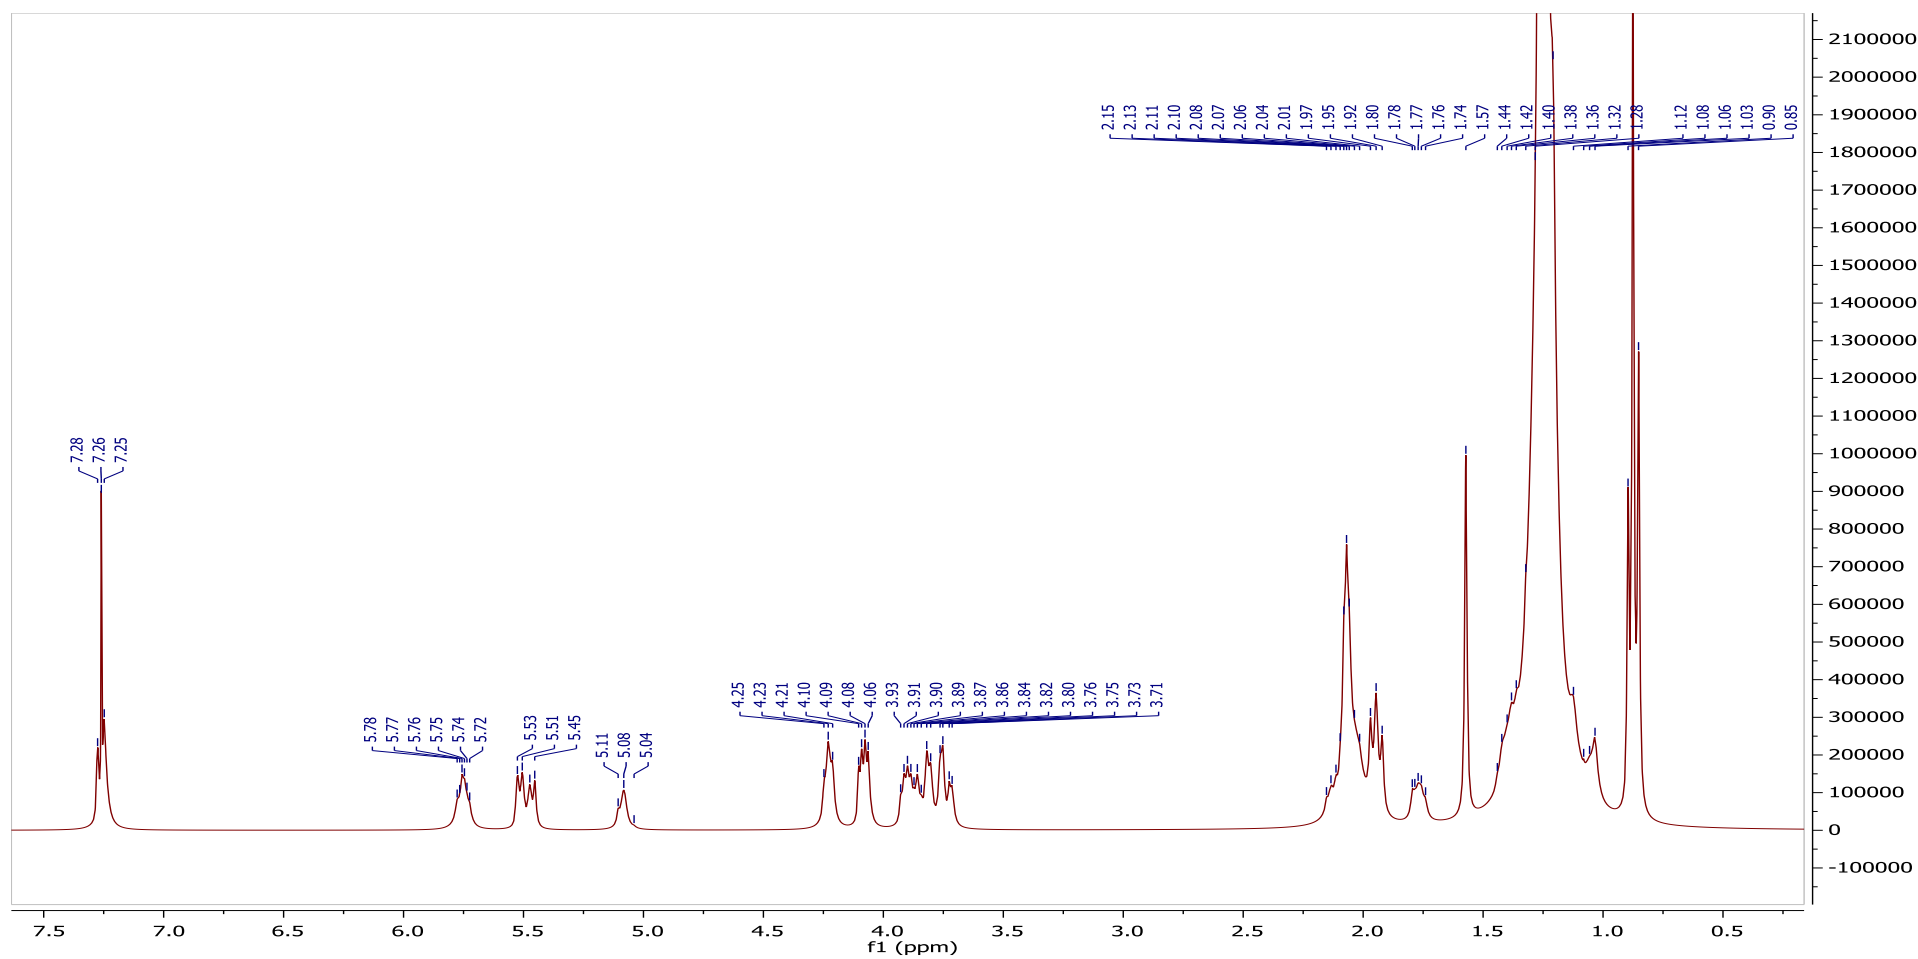

Figure S4.  $^1\text{H}$  NMR spectra of ceramide A (1)

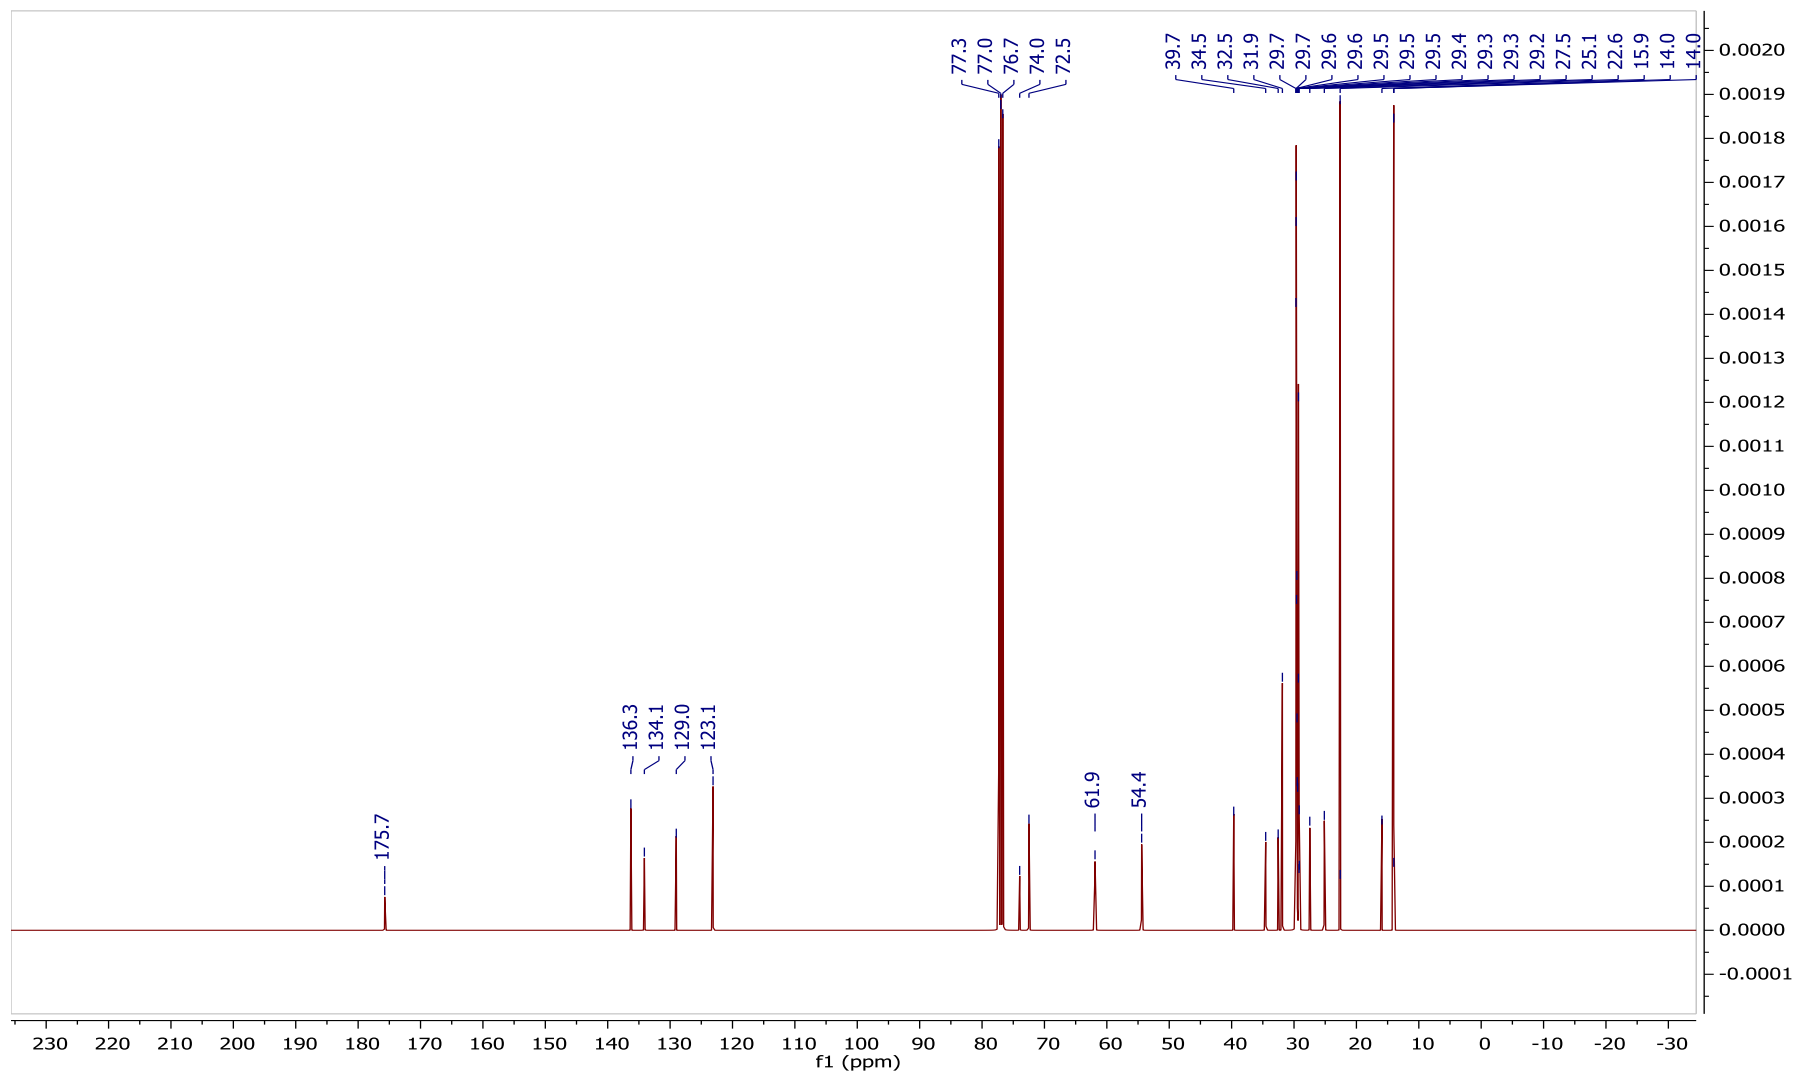

Figure S5.  $^{13}\text{C}$  NMR spectra of ceramide A (1)

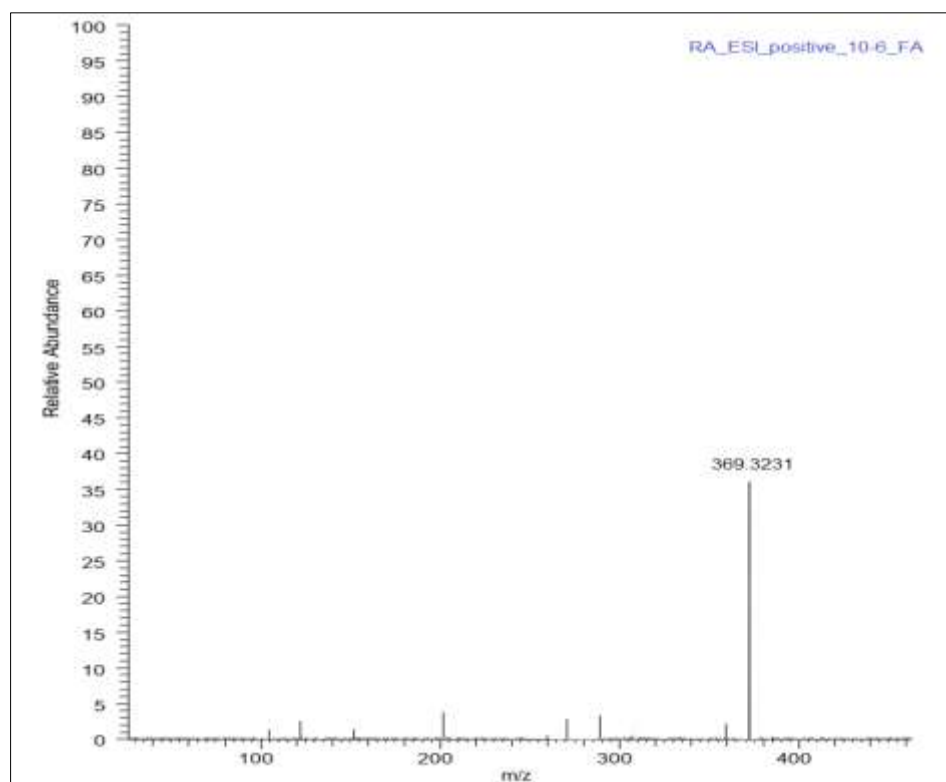

Figure S6. ESI-HRMS chromatogram of fatty acid methyl ester of ceramide **A** (**1**)

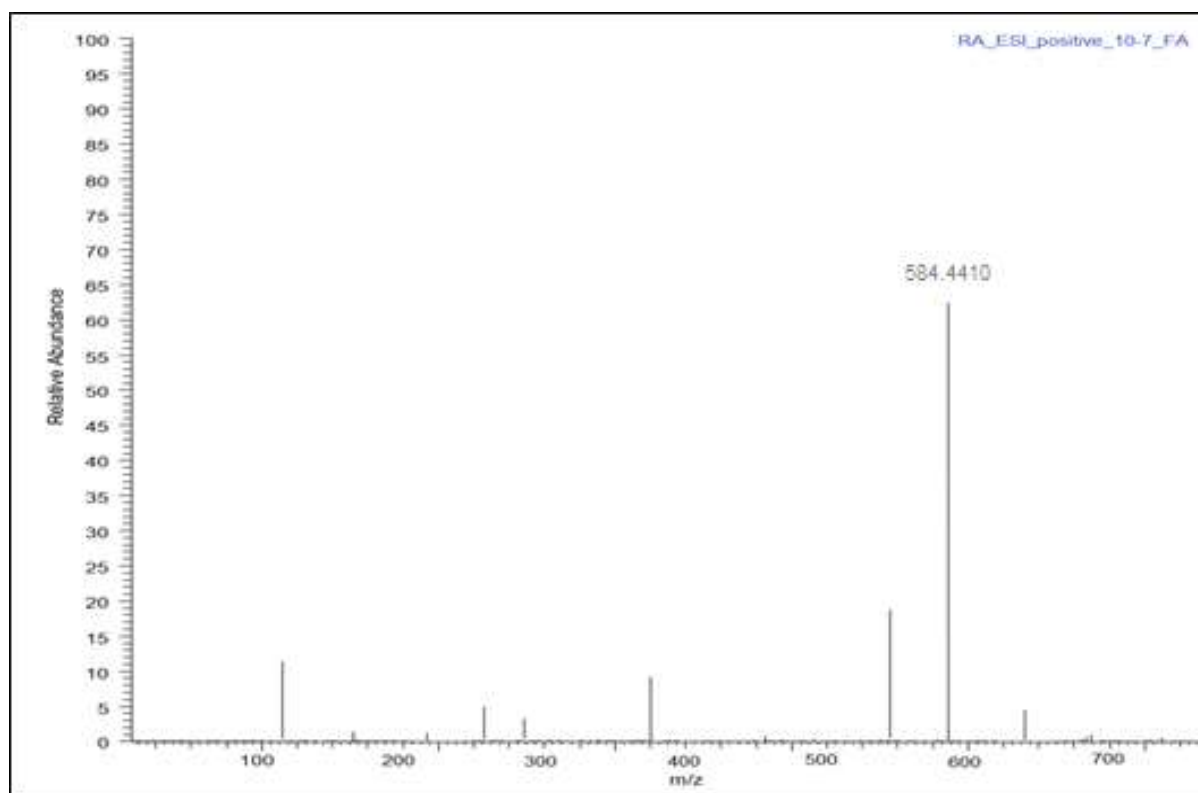

Figure S7. ESI-HRMS chromatogram of ceramide **B** (**2**)



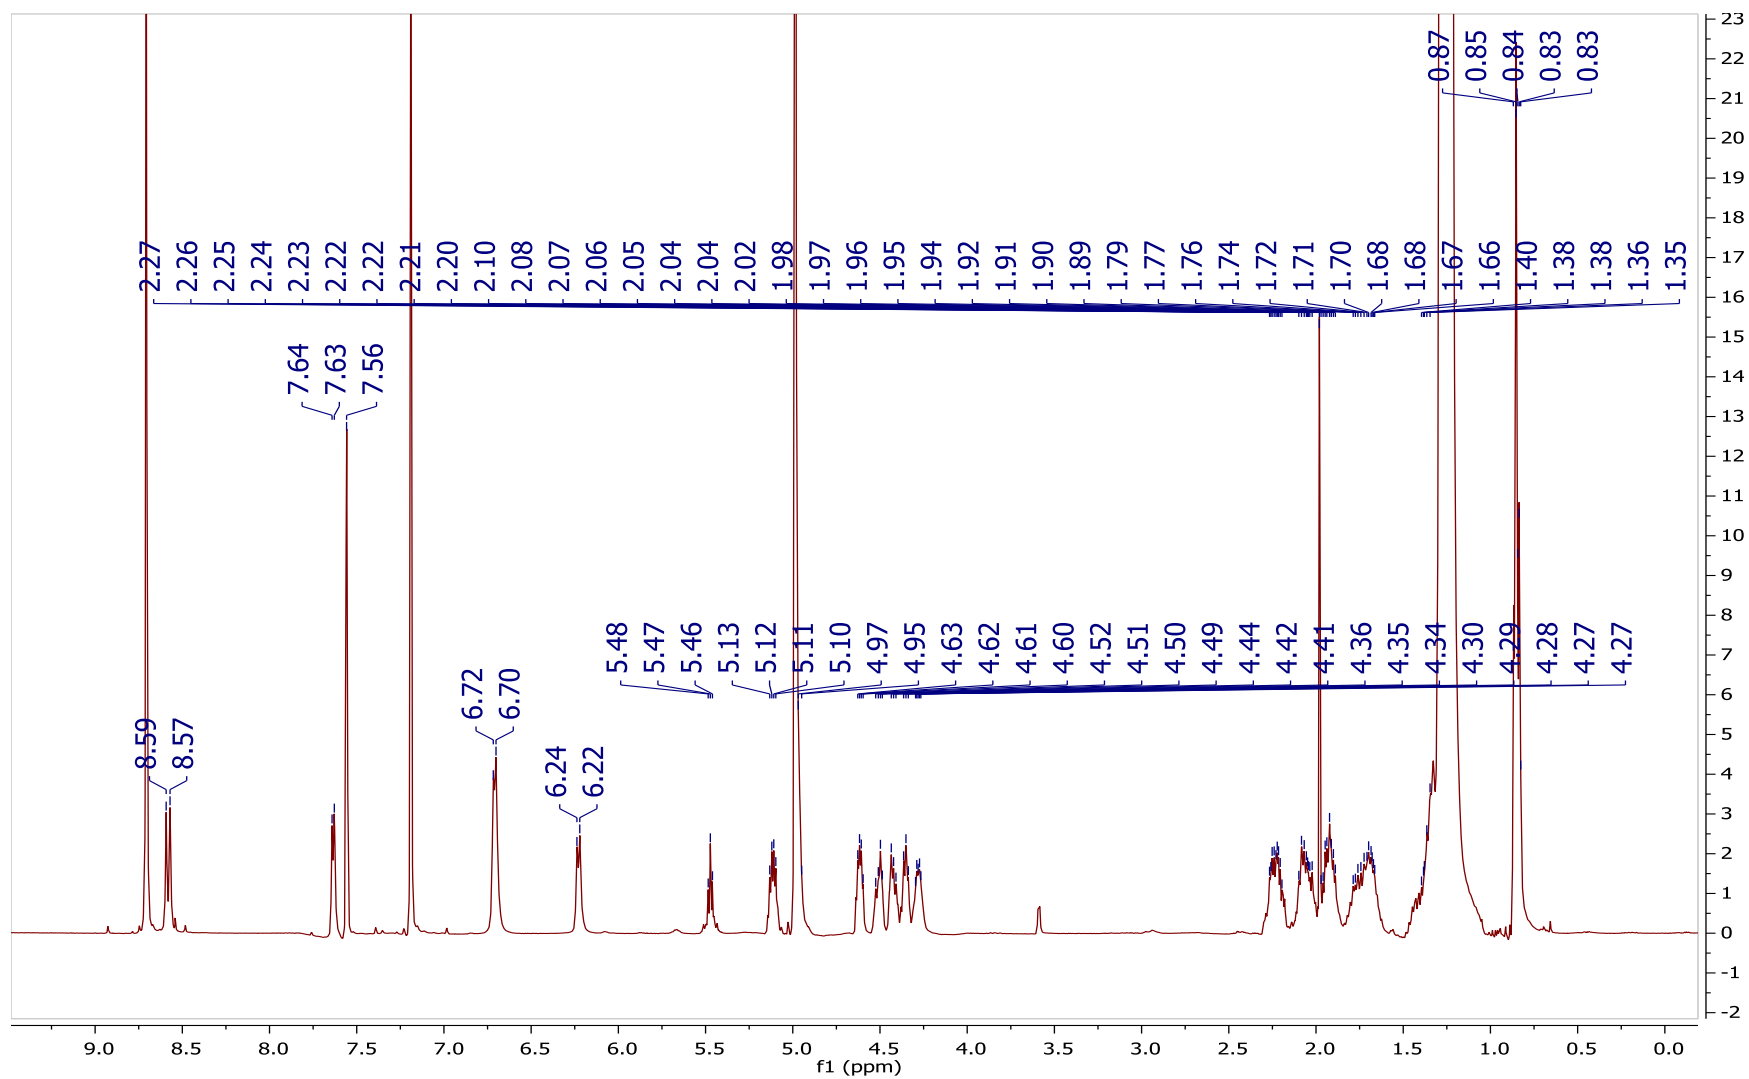

Figure S8.  $^1\text{H}$  NMR spectra of ceramide **B** (2)

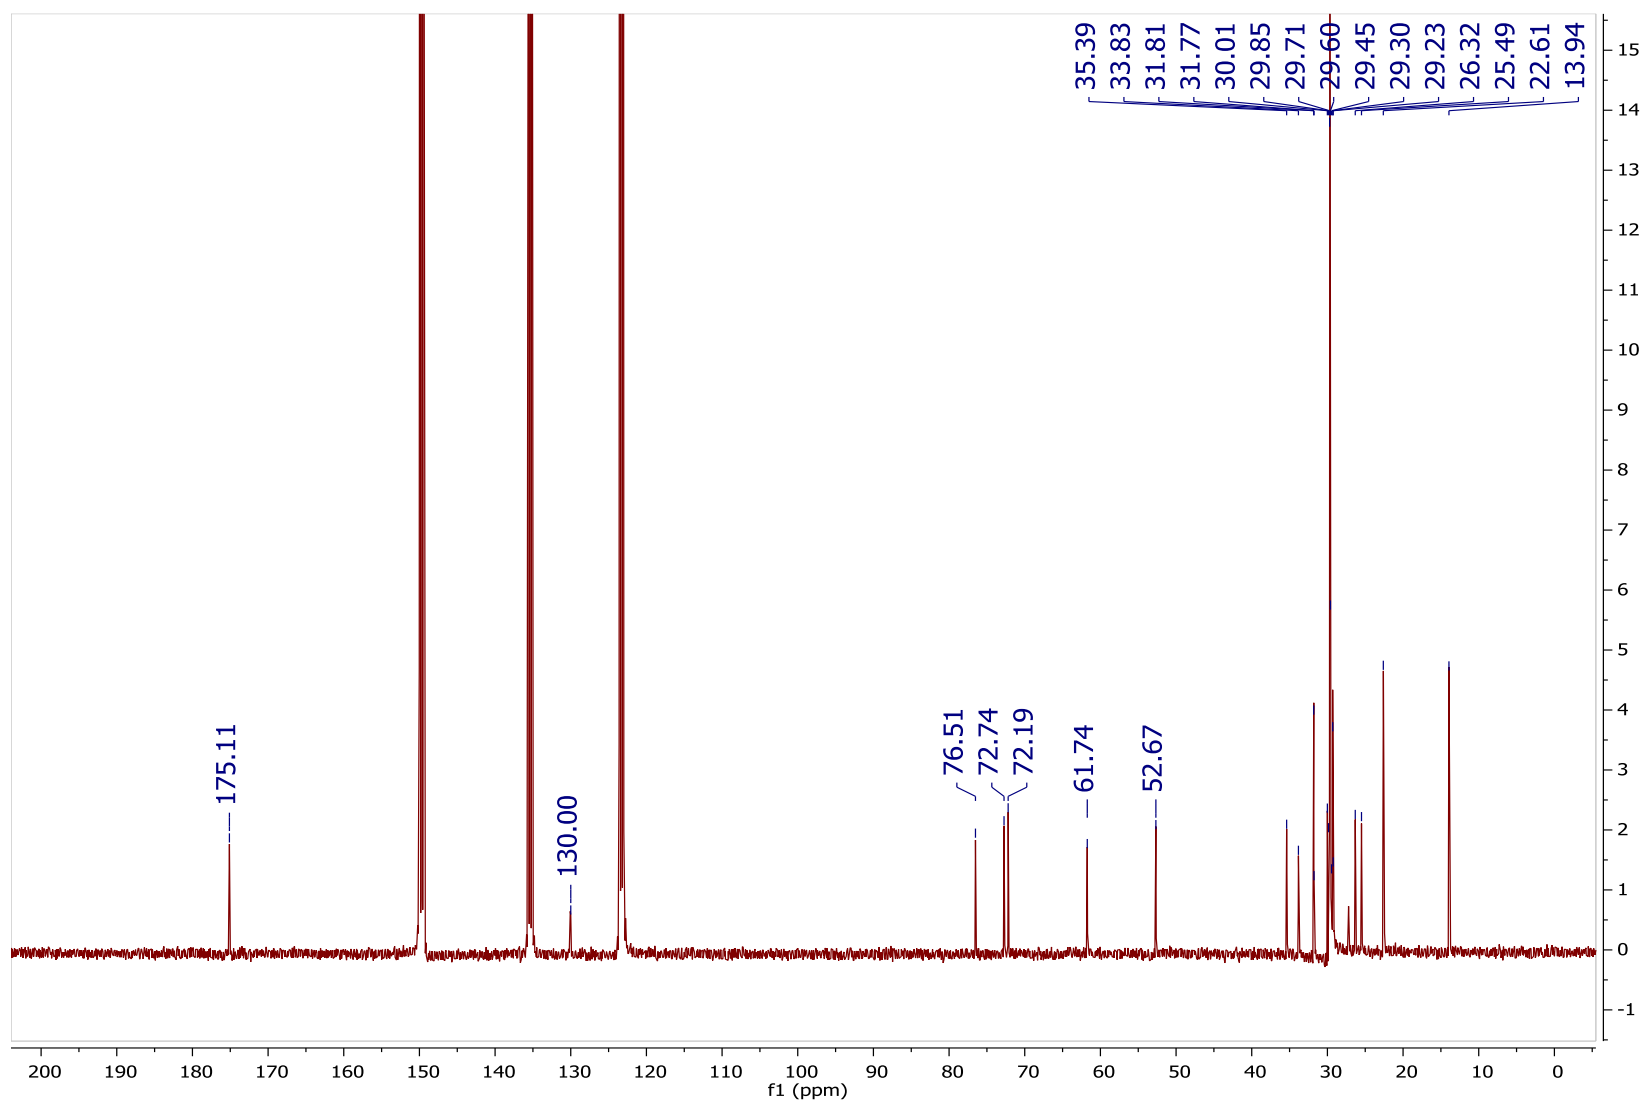

Figure S9. <sup>13</sup>C NMR spectra of ceramide **B** (2)

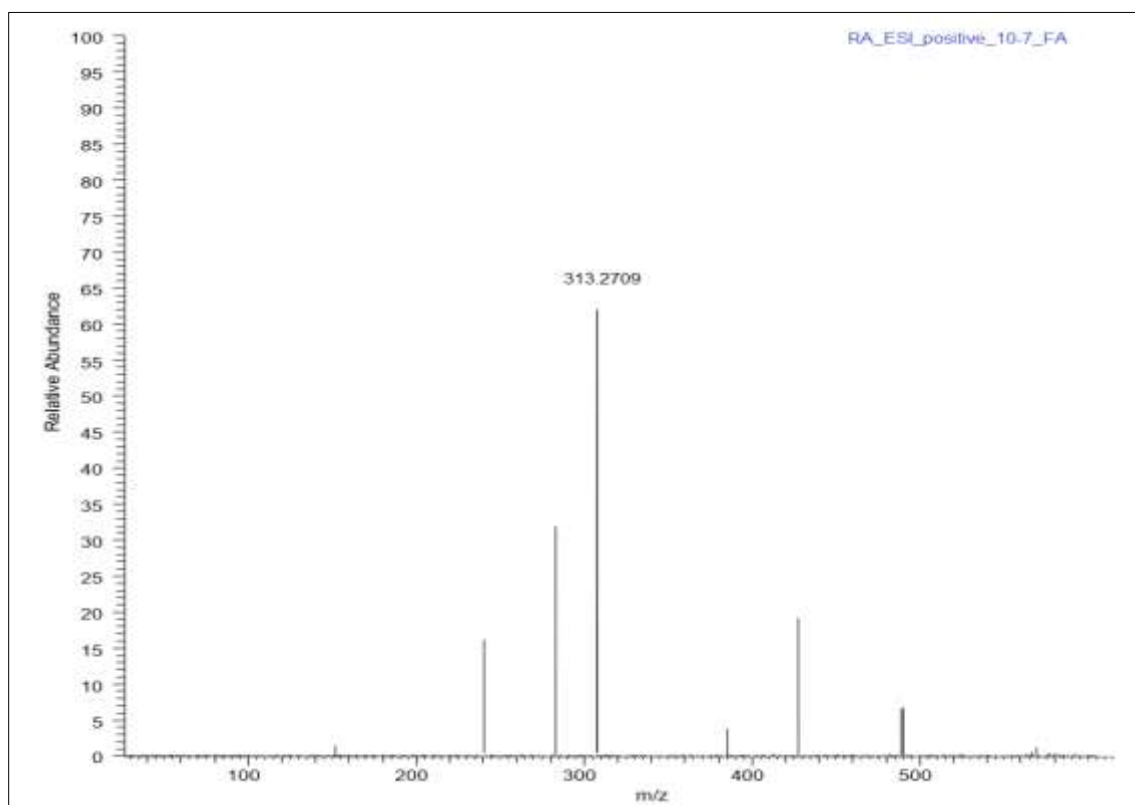

Figure S10. ESI-HRMS chromatogram of fatty acid methyl ester of ceramide **B** (**2**)

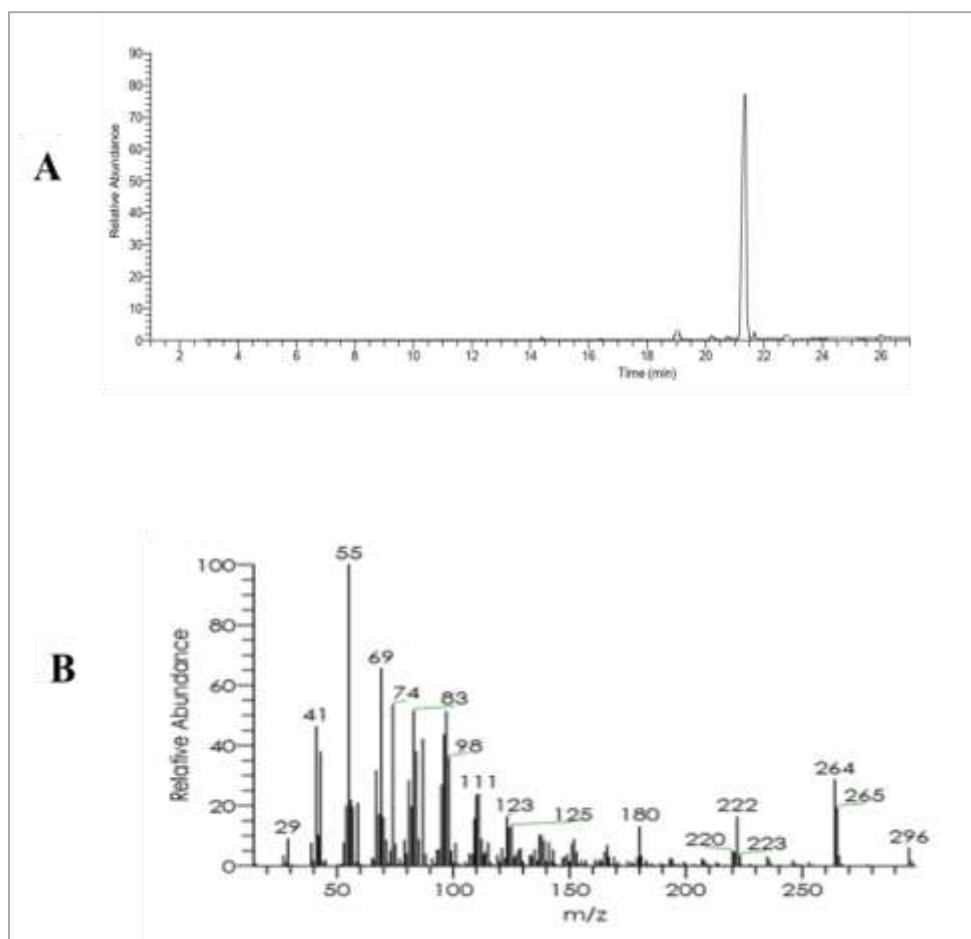

Figure S11. GC-MS analysis, GC-MS chromatogram (**A**) and fragmentation pattern (**B**), of fatty acid methyl ester of ceramide **B** (**2**)

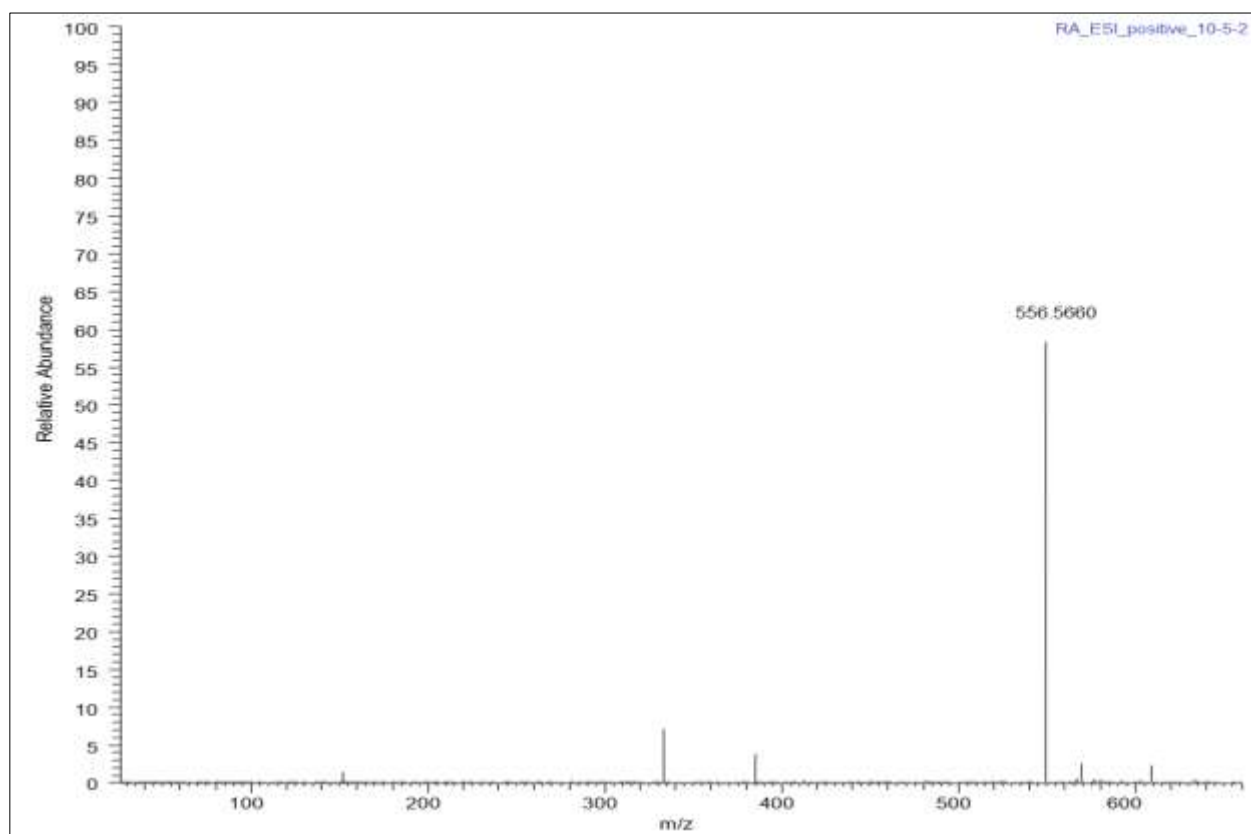

Figure S12. ESI-HRMS chromatogram of ceramide **C (3)**

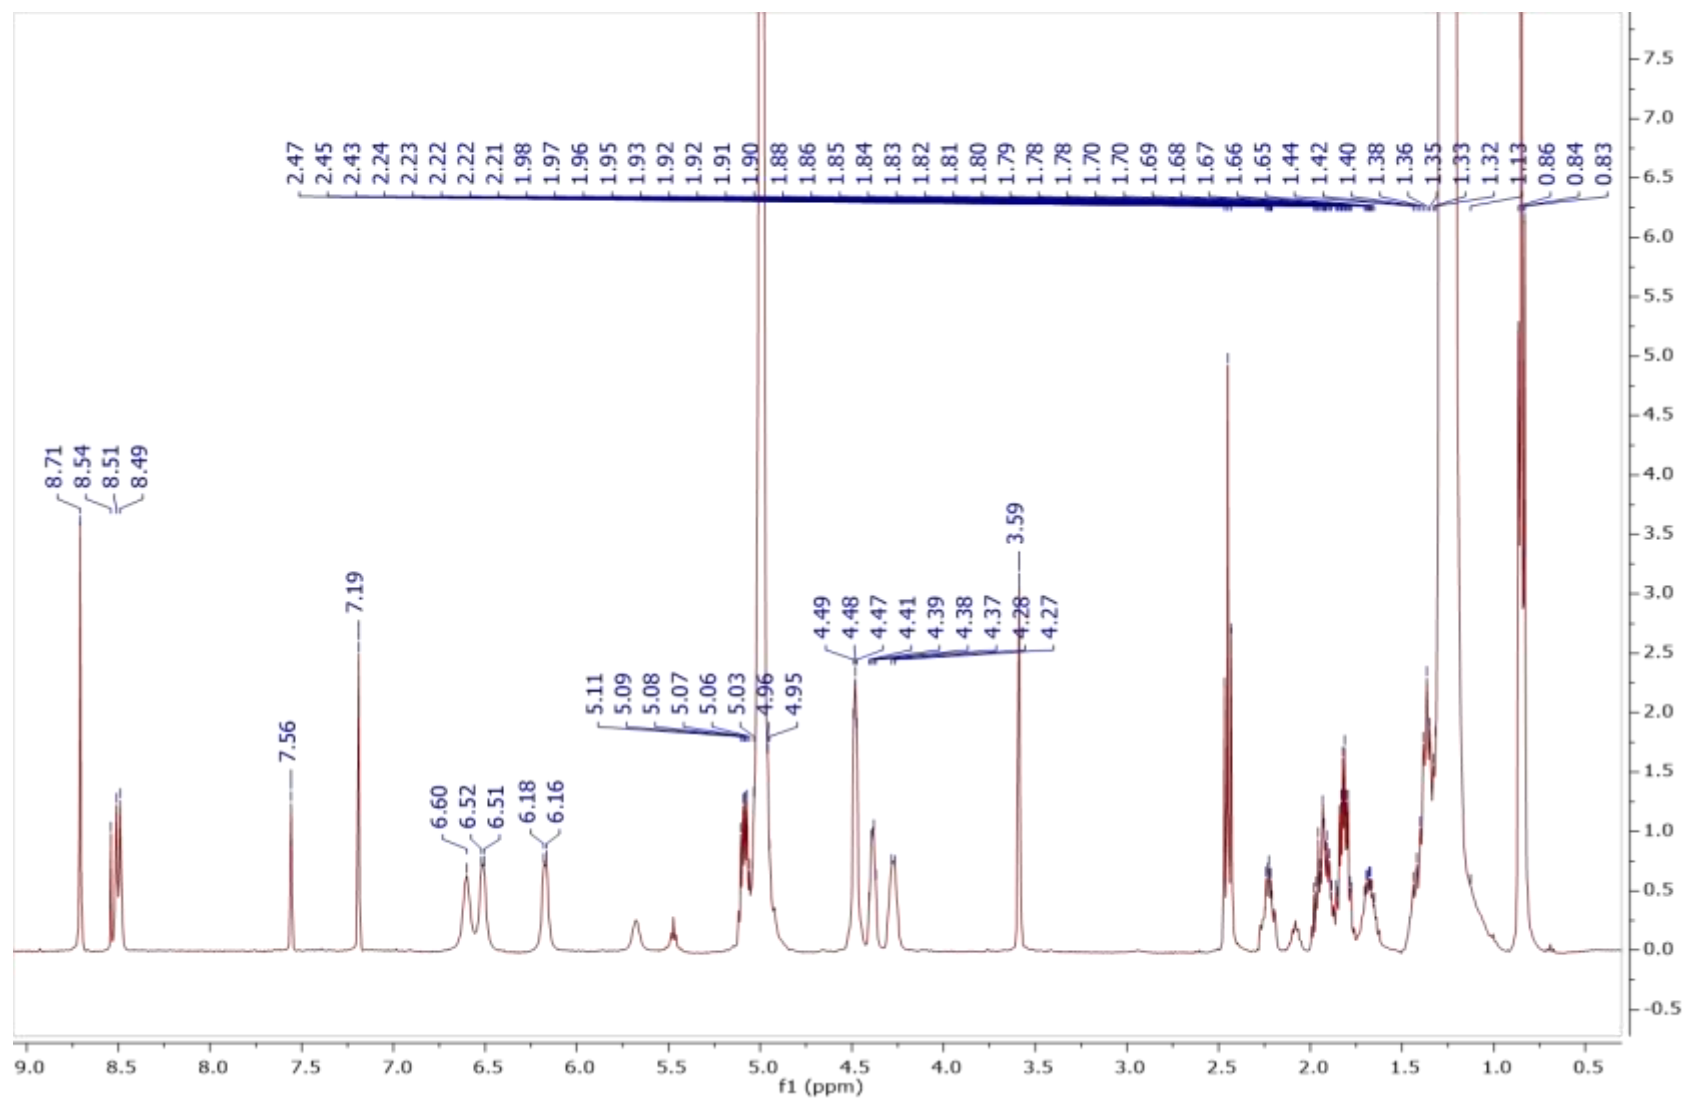

Figure S13.  $^1\text{H}$  NMR spectra of ceramide **C** (**3**)

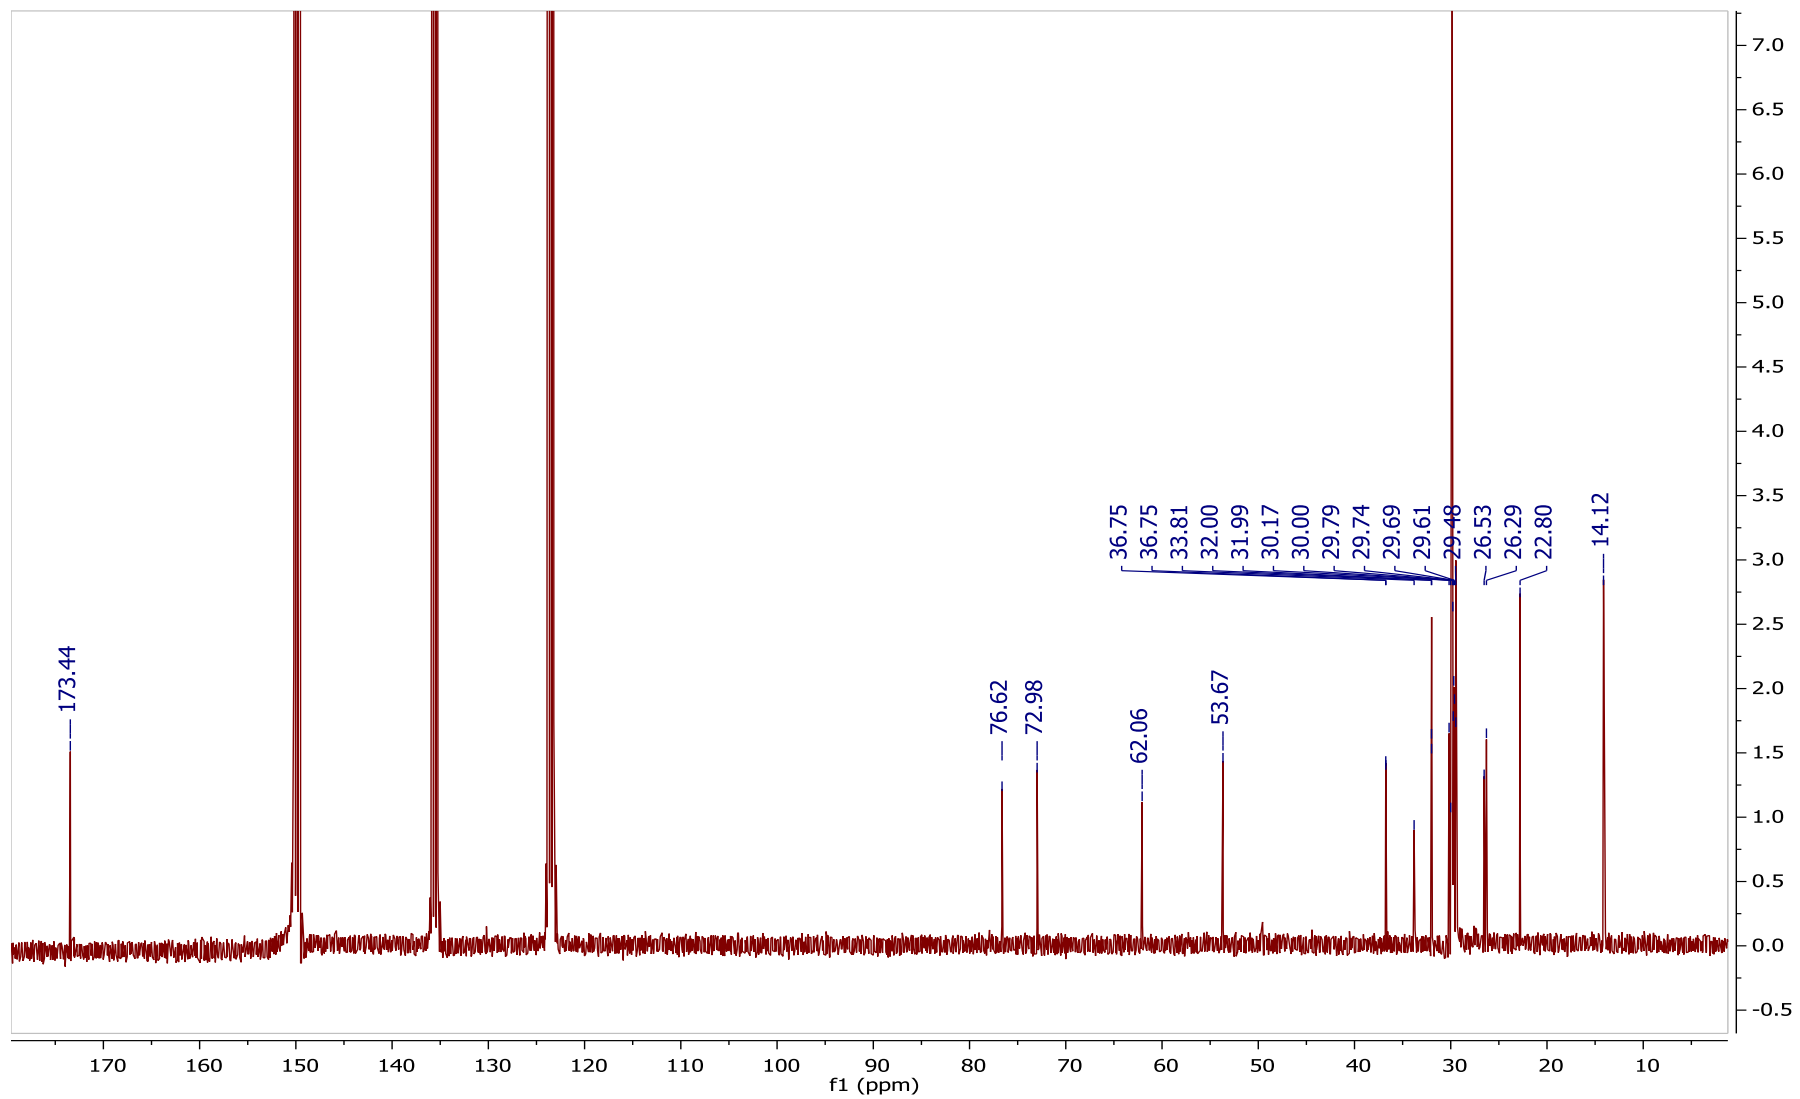

Figure S14.  $^{13}\text{C}$  NMR spectra of ceramide C (3)

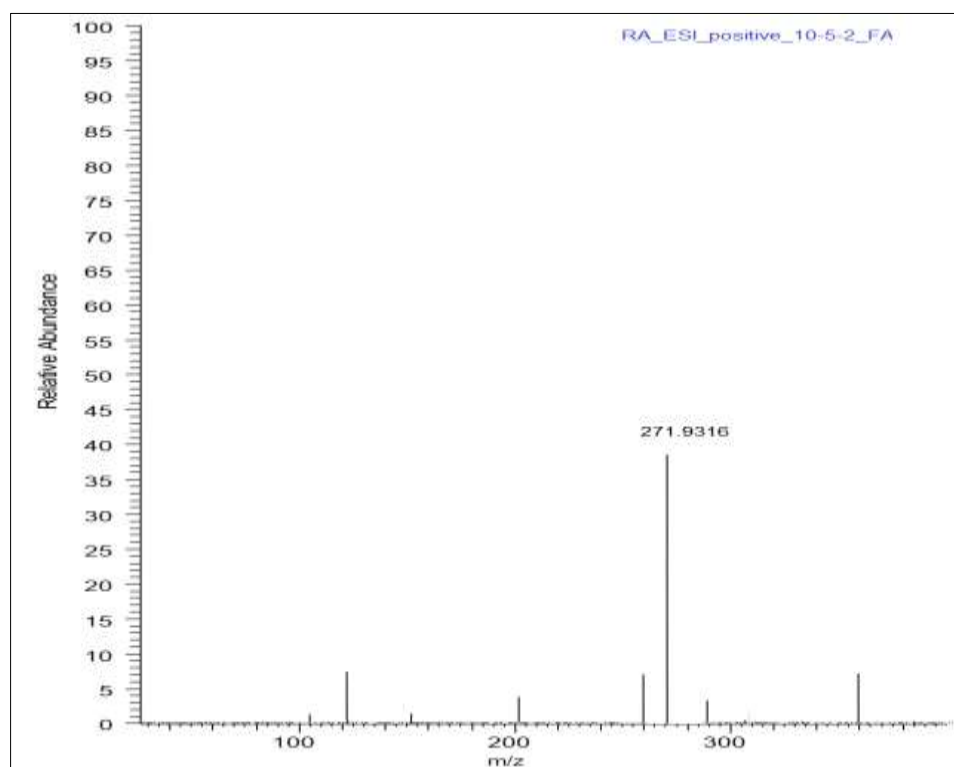

Figure S15. ESI-HRMS chromatogram of fatty acid methyl ester of ceramide **C** (**3**)



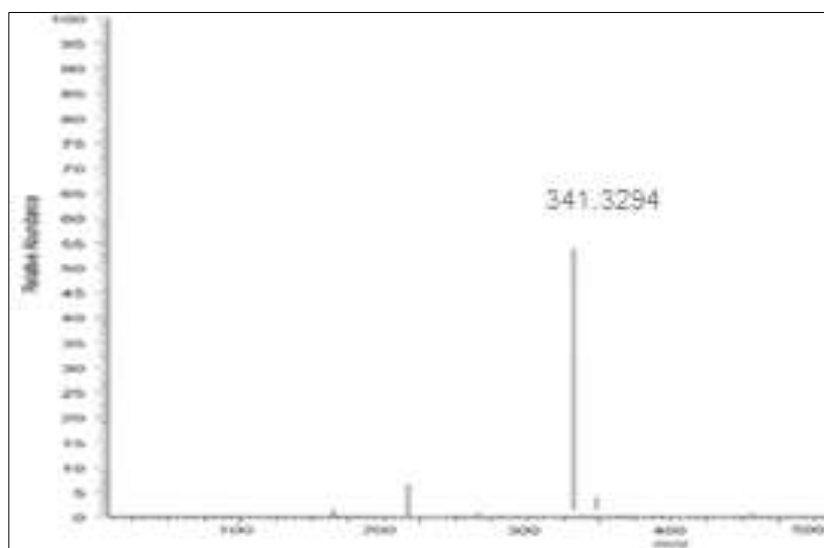

Figure S16. ESI-HRMS chromatogram of compound **4**.

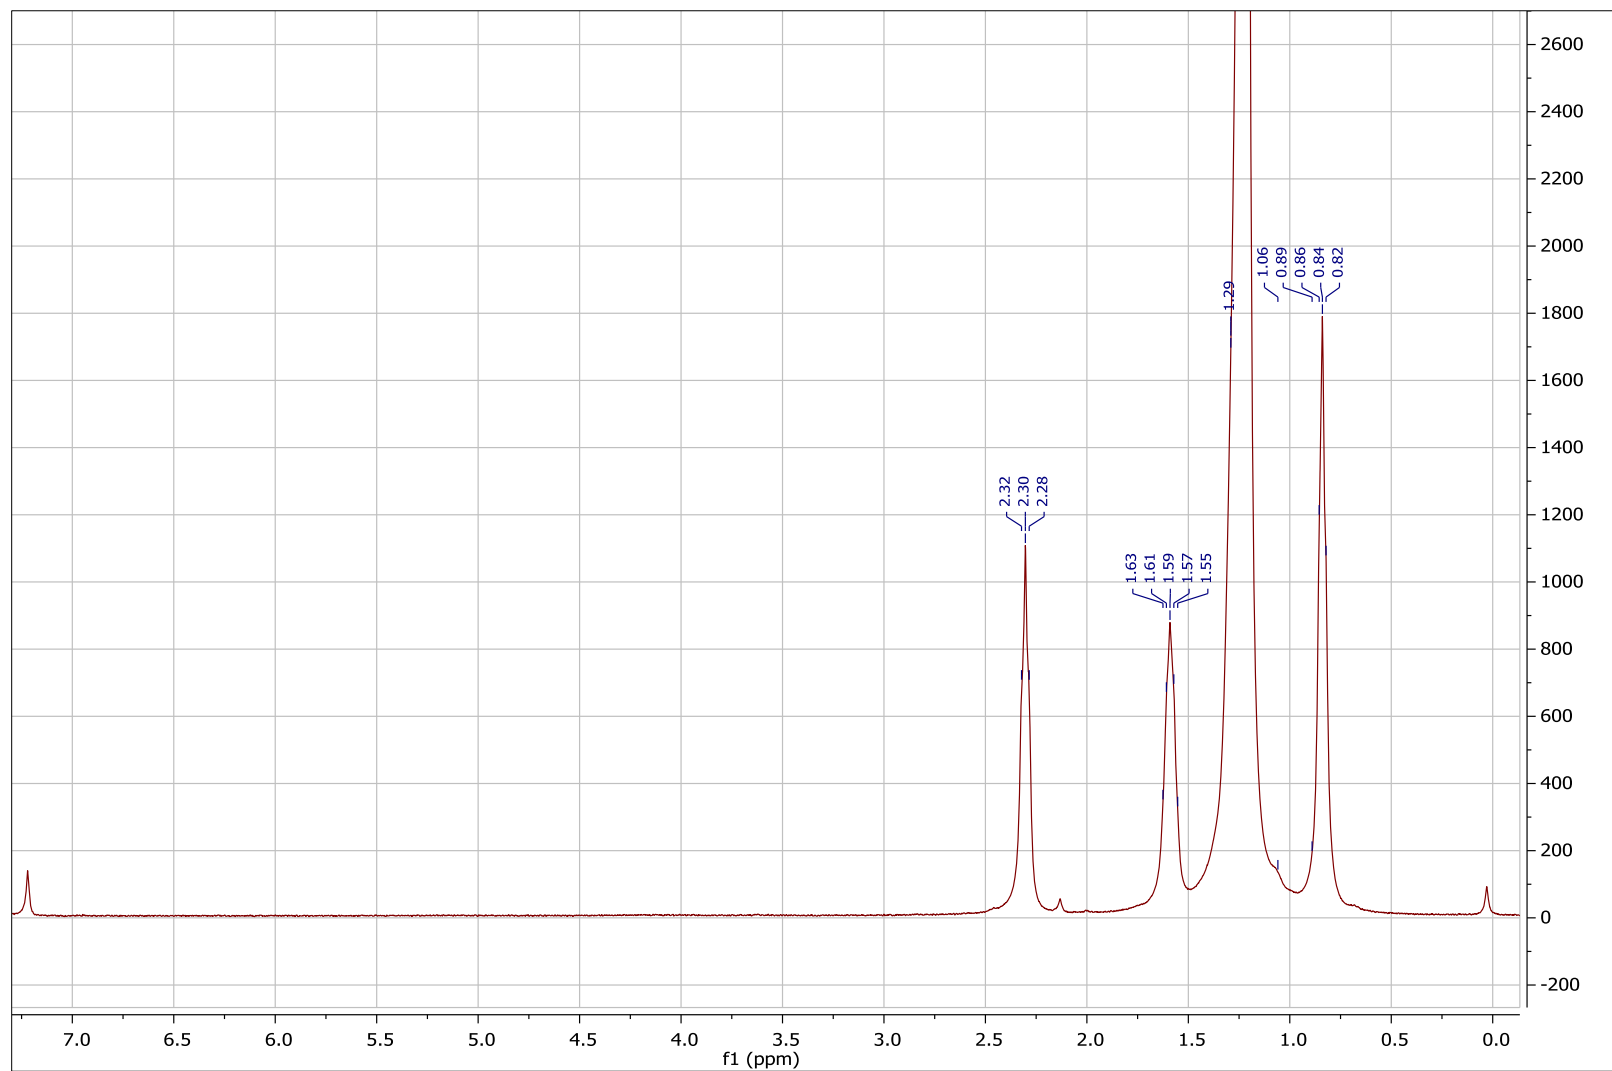

Figure S17. <sup>1</sup>H NMR spectra of compound **4**.

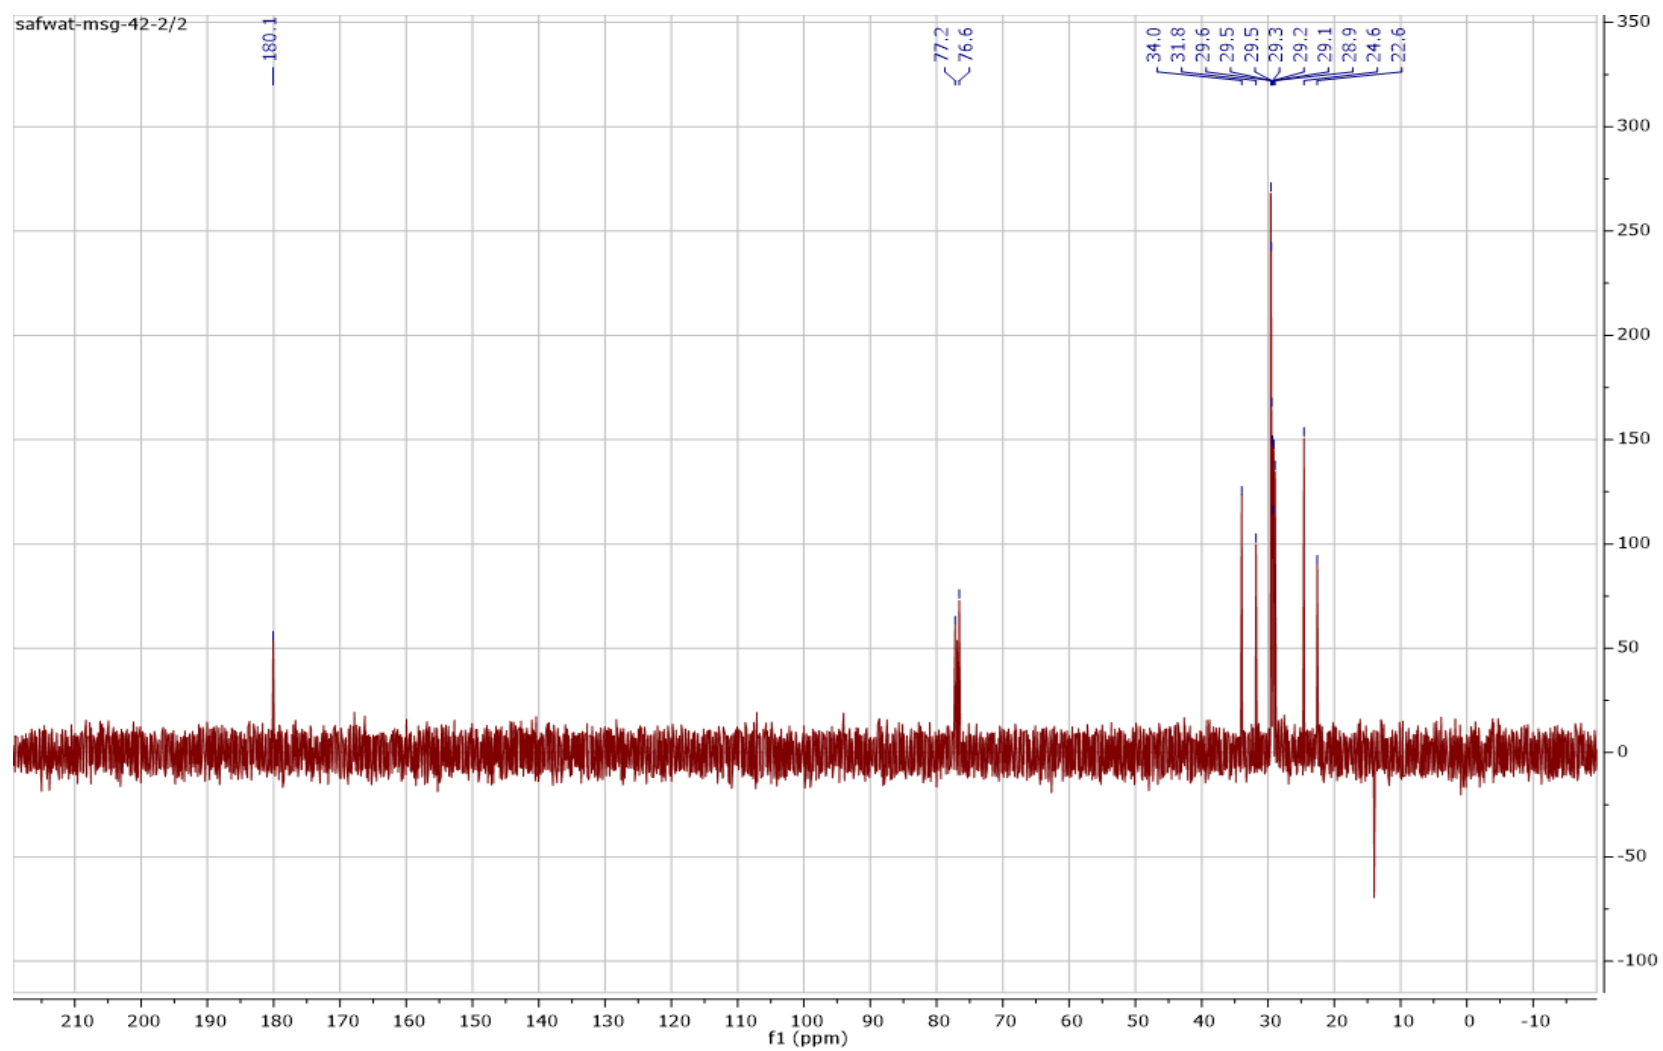

Figure S18.  $^{13}\text{C}$  APT NMR spectra of compound **4**.

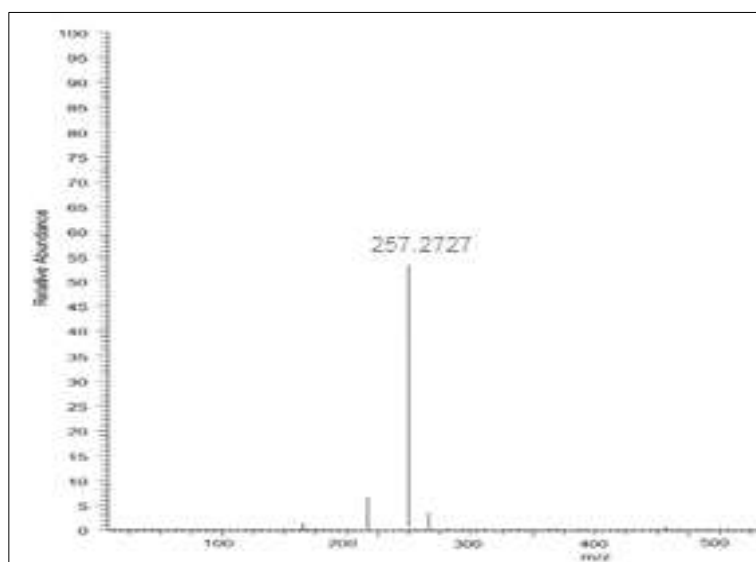

Figure S19. ESI-HRMS chromatogram of compound **5**.

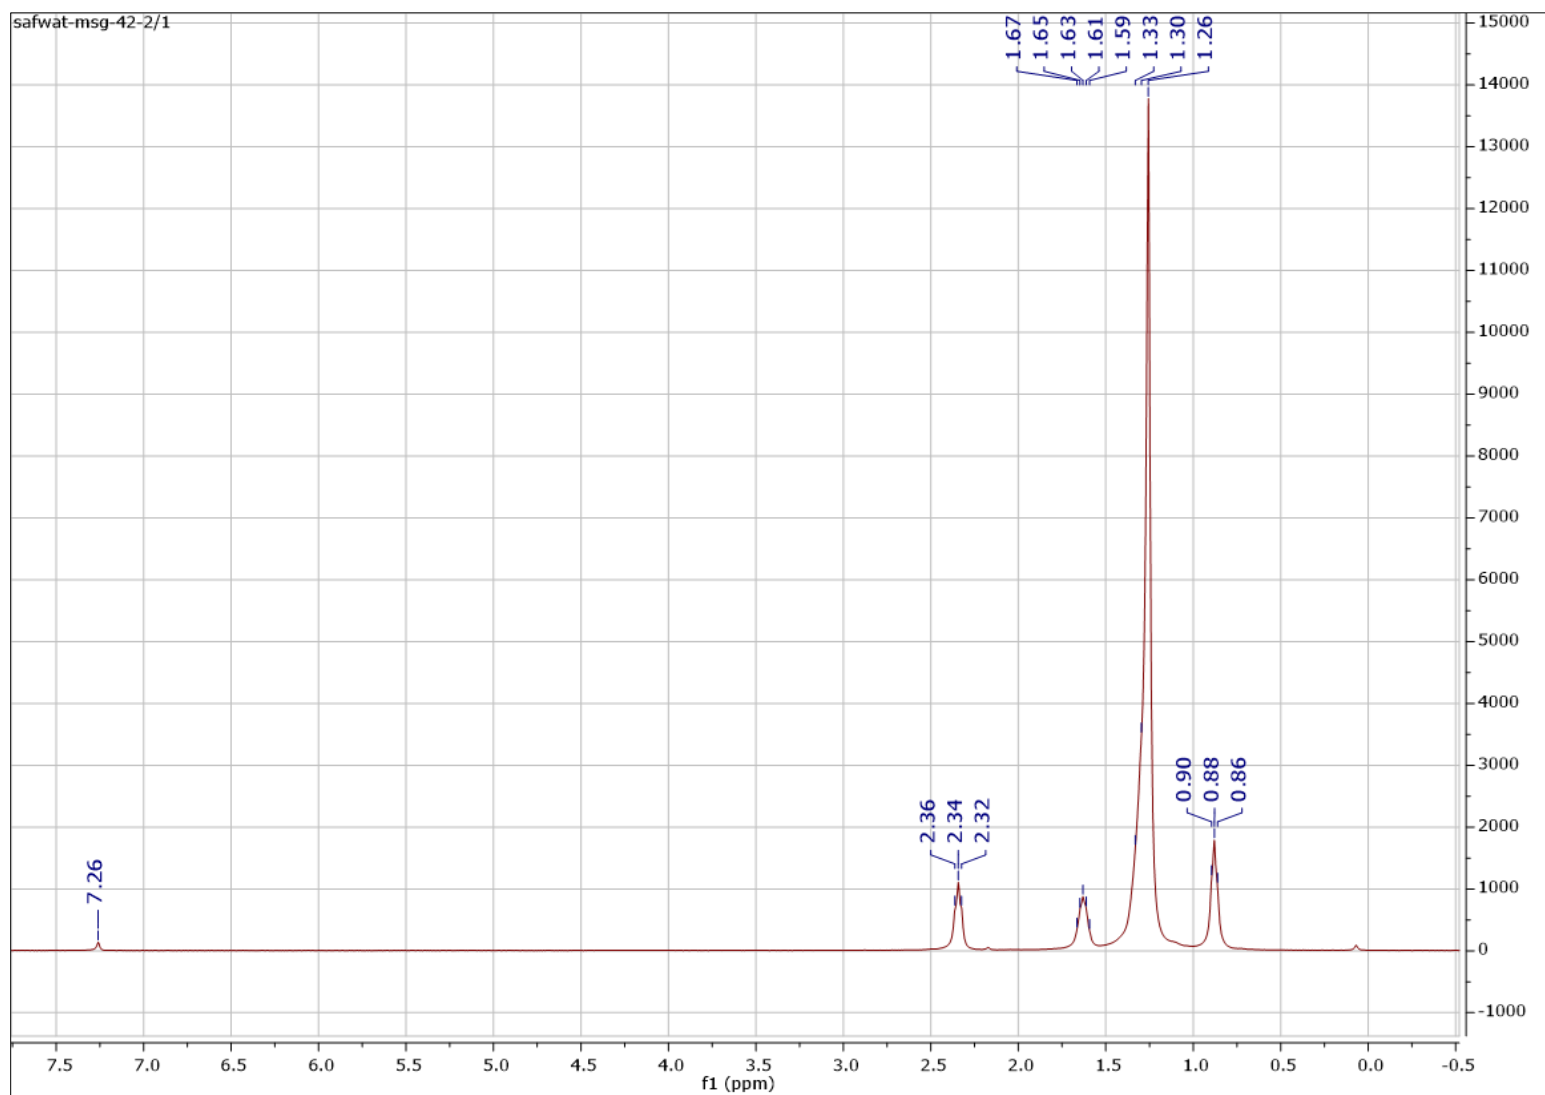

Figure S20.  $^1\text{H}$  NMR spectra of compound **5**.

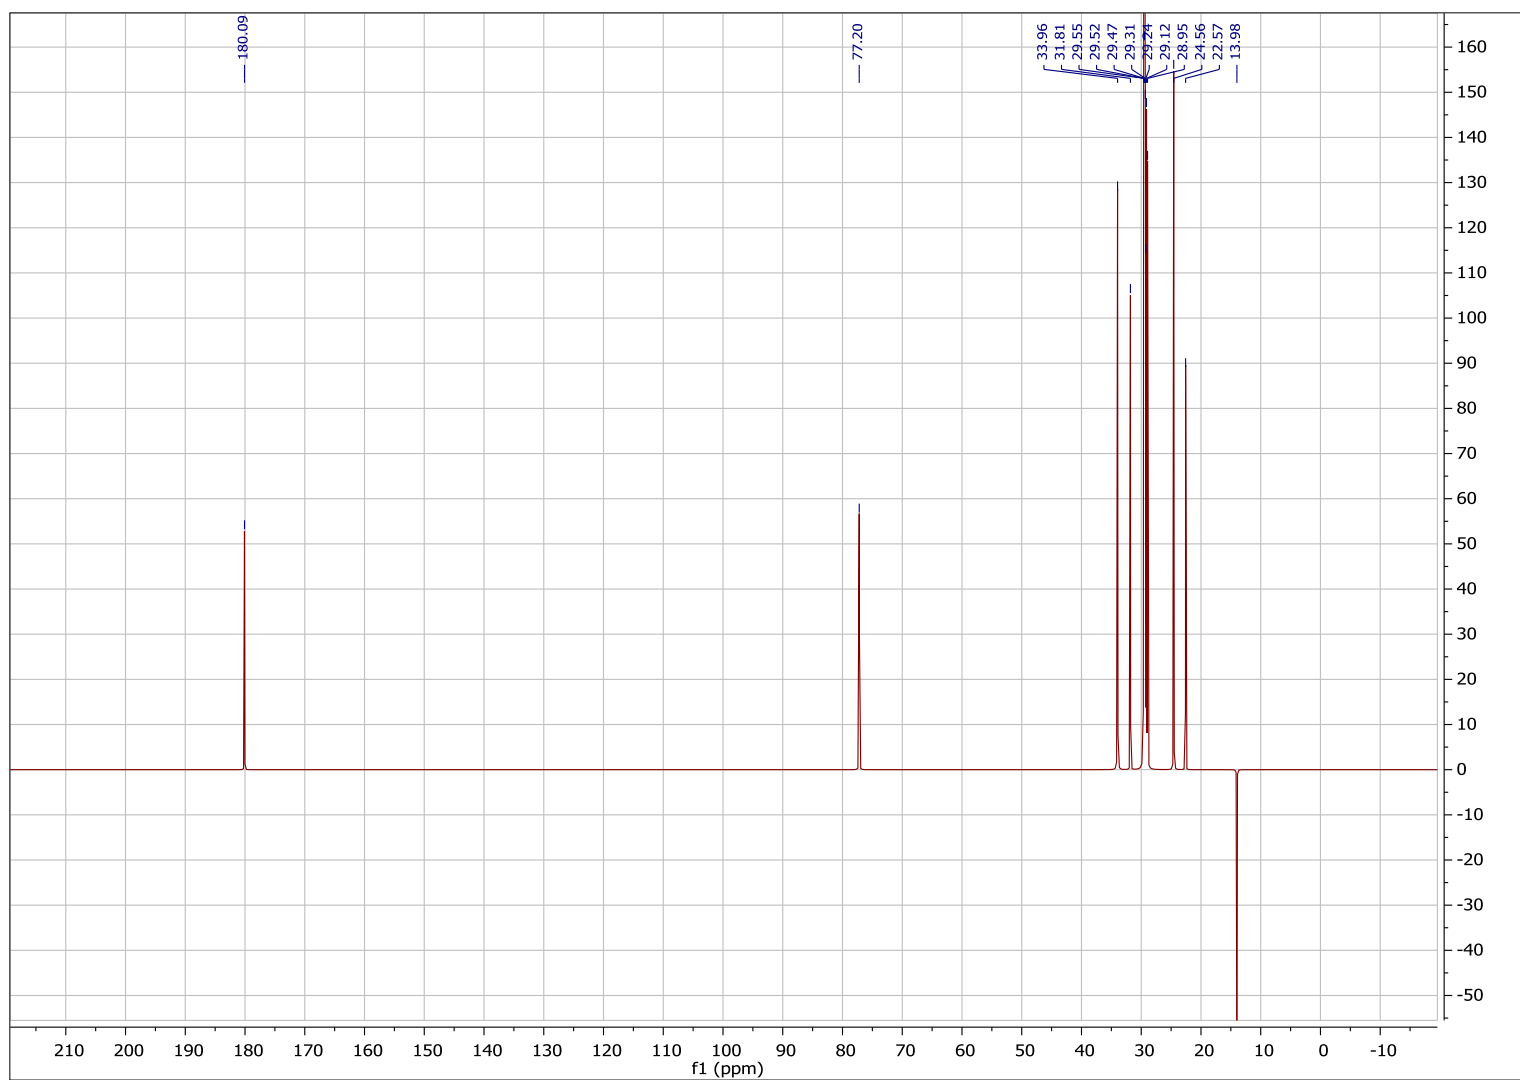

Figure S21.  $^{13}\text{C}$  APT NMR spectra of compound **5**.

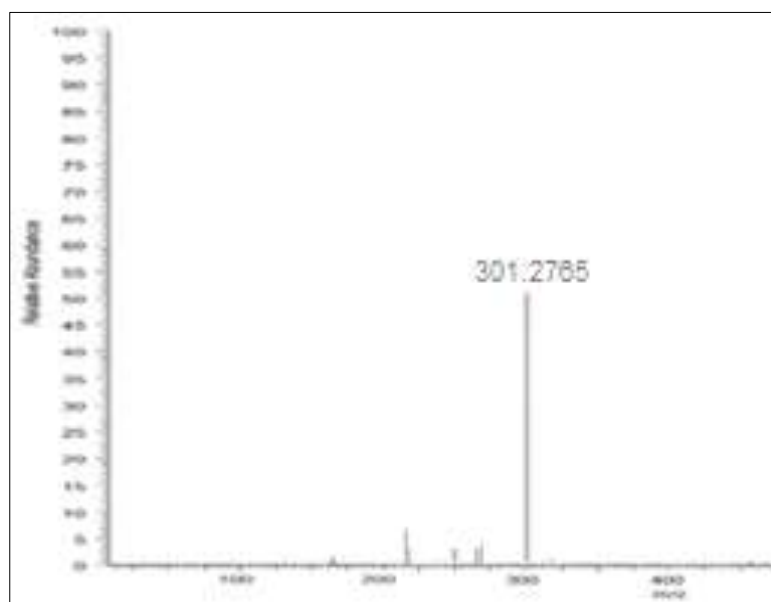

Figure S22. ESI-HRMS chromatogram of compound **6**.

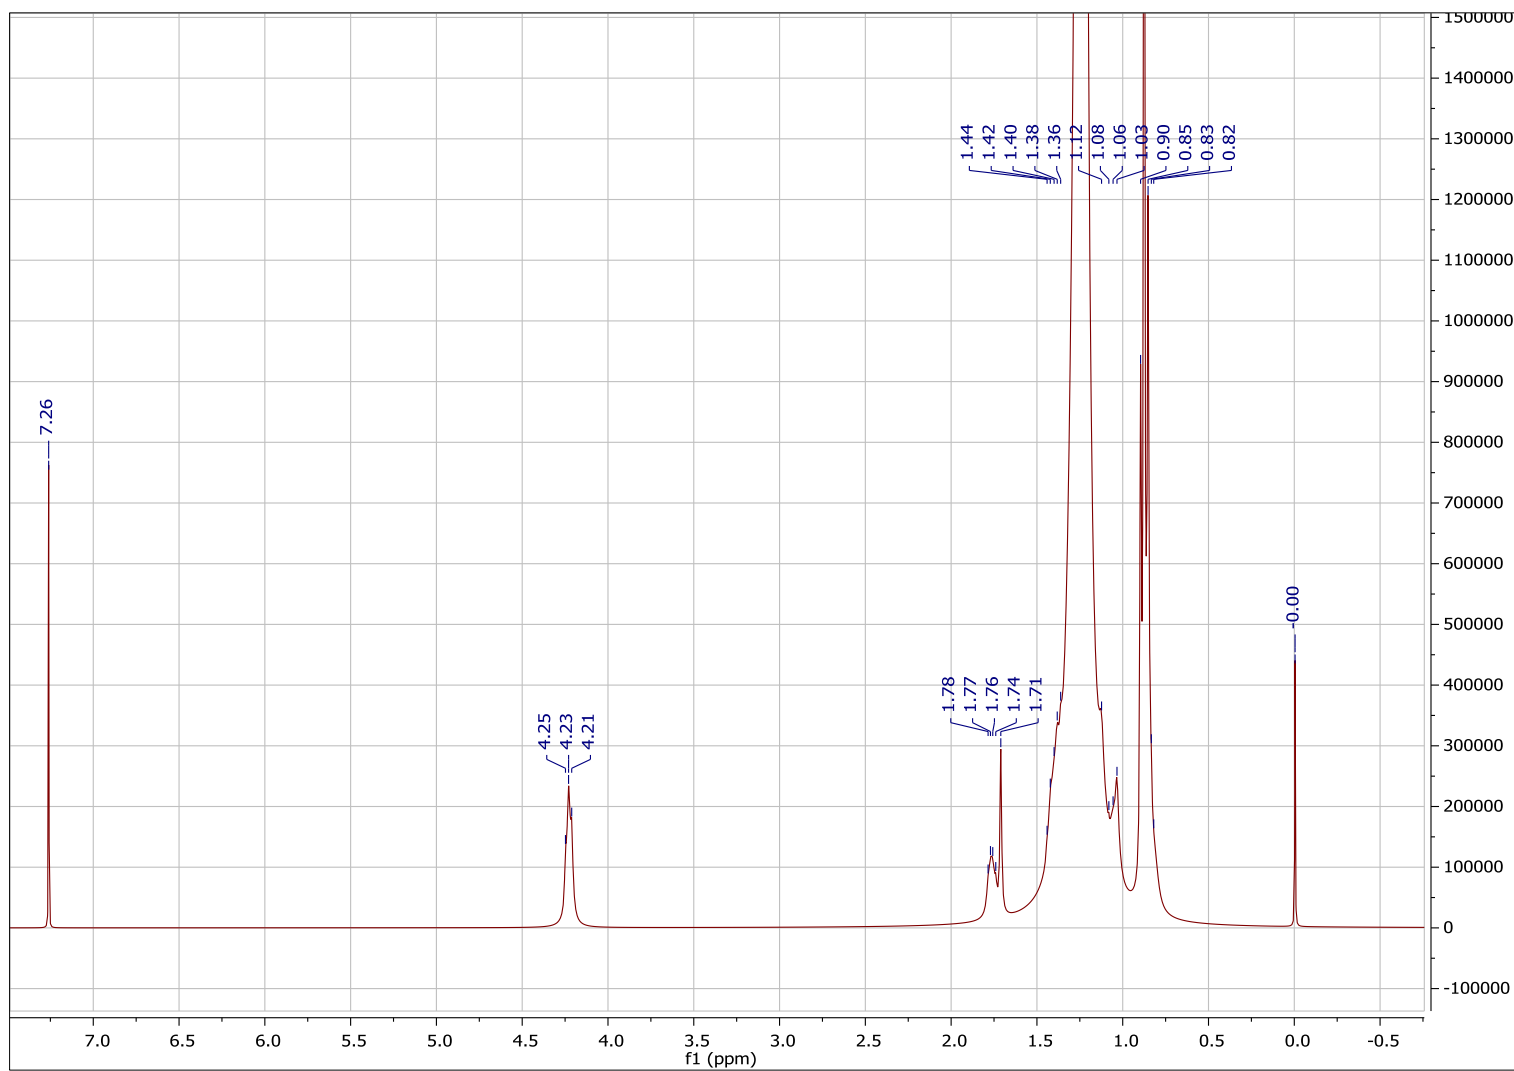

Figure S23.  $^1\text{H}$  NMR spectra of compound **6**.



Table S1. Liver enzymes and kidney markers in the study groups.

|                      | ALT<br>(IU/L) | AST<br>(IU/L) | Urea<br>(mg/dL) | Creatinine<br>(mg/dL) |
|----------------------|---------------|---------------|-----------------|-----------------------|
| Normal               | 44.60 ± 4.29  | 53.78 ± 6.31  | 18.52 ± 3.22    | 0.90 ± 0.15           |
| Control              | 53.59 ± 6.11  | 63.61 ± 6.90  | 25.33 ± 5.60    | 1.30 ± 0.25           |
| Ceramide 1 (1 mg/kg) | 51.23 ± 4.10  | 62.31 ± 5.40  | 25.32 ± 6.66    | 1.25 ± 0.24           |
| Ceramide 1 (2 mg/kg) | 50.31 ± 5.91  | 60.40 ± 5.70  | 24.76 ± 6.87    | 1.22 ± 0.27           |
| Ceramide 2 (1 mg/kg) | 52.51 ± 5.10  | 61.33 ± 5.89  | 24.83 ± 6.50    | 1.24 ± 0.27           |
| Ceramide 2 (2 mg/kg) | 49.32 ± 6.90  | 60.32 ± 7.10  | 23.60 ± 6.98    | 1.21 ± 0.26           |

Values are expressed as mean ± SD. Data were analyzed using ANOVA followed by Bonferroni post hoc test.
